# Supplementary material for: Formation mechanism of an Al13 Keggin cluster in hydrated layered polysilicates
Source: Royal Society of Chemistry journal article supplement (doi:10.1039/d0dt00529k), 2020-01-01
Supplement: d0dt00529k1.pdf [file d0dt00529k1.pdf]

## Supporting Information

### Formation Mechanism of $\text{Al}_{13}$ Keggin Cluster in Hydrated Layered Polysilicates

Man Park,\* Yun-Ju Kang, Jeong-Hun Jang, Jae-Deok Seo, Junhyung Kim, Seung-Min Paek,  
Woo Taik Lim and Sridhar Komarneni

\*Correspondence to: [manpark@knu.ac.kr](mailto:manpark@knu.ac.kr)

**This file includes:** Fig. S1† to S3†

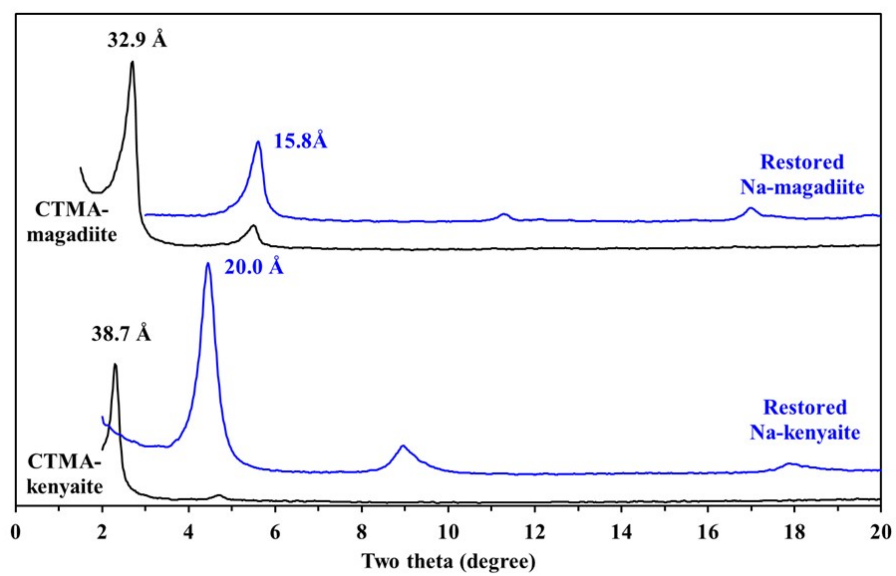

**Fig. S1†.** XRD patterns of CTMA-treated and Na<sup>+</sup>-restored magadiites and kenyaite.

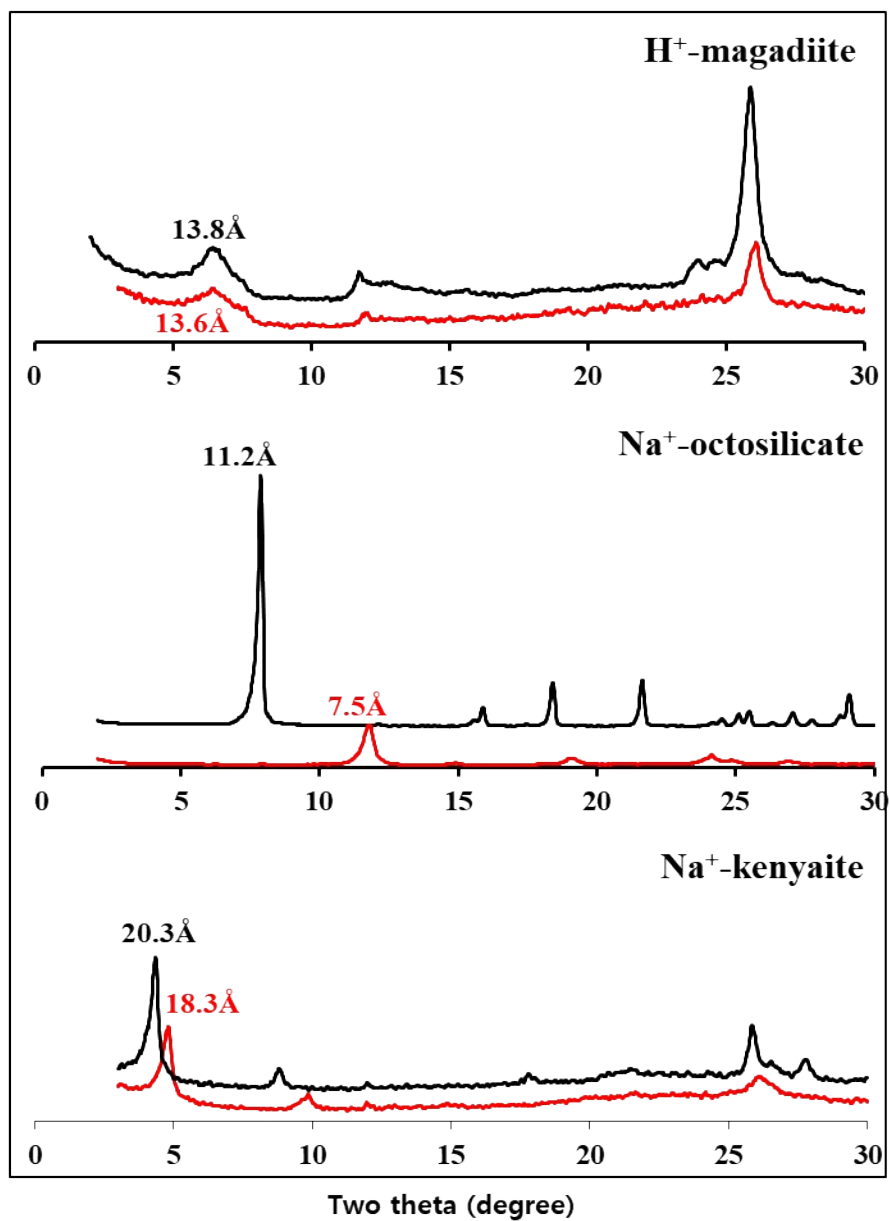

**Fig. S2†.** XRD patterns of H<sup>+</sup>-magadiite, Na<sup>+</sup>-octosilicate and Na<sup>+</sup>-kenyaite before (black line) and after (red line) Al<sup>3+</sup> treatment. Na<sup>+</sup>-kenyaite was treated with 0.4 mM Al<sup>3+</sup> whereas H<sup>+</sup>-magadiite and Na<sup>+</sup>-octosilicate were treated with 0.4 mM Al<sup>3+</sup>.

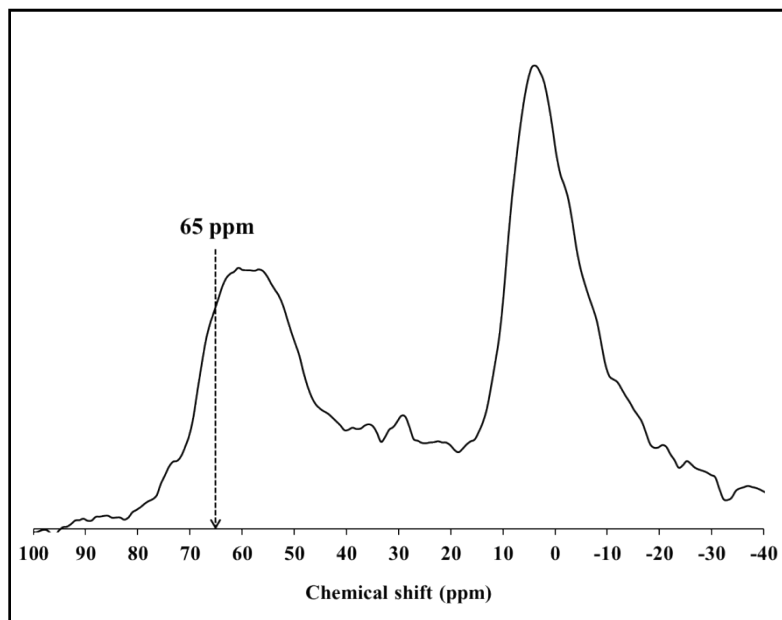

**Fig. S3†.**  $^{27}\text{Al}$  NMR spectrum of  $\text{Na}^+$ -kenyaite treated in 1.0 mM  $\text{Al}^{3+}$  solution.
